# Supplementary material for: The cabABC Operon Essential for Biofilm and Rugose Colony Development in Vibrio vulnificus
Source: PubMed Central journal article supplement (PMC4584020; doi:10.1371/journal.ppat.1005192), 2015-09-25
Supplement: ppat.1005192.s001.pdf [file ppat.1005192.s001.pdf]

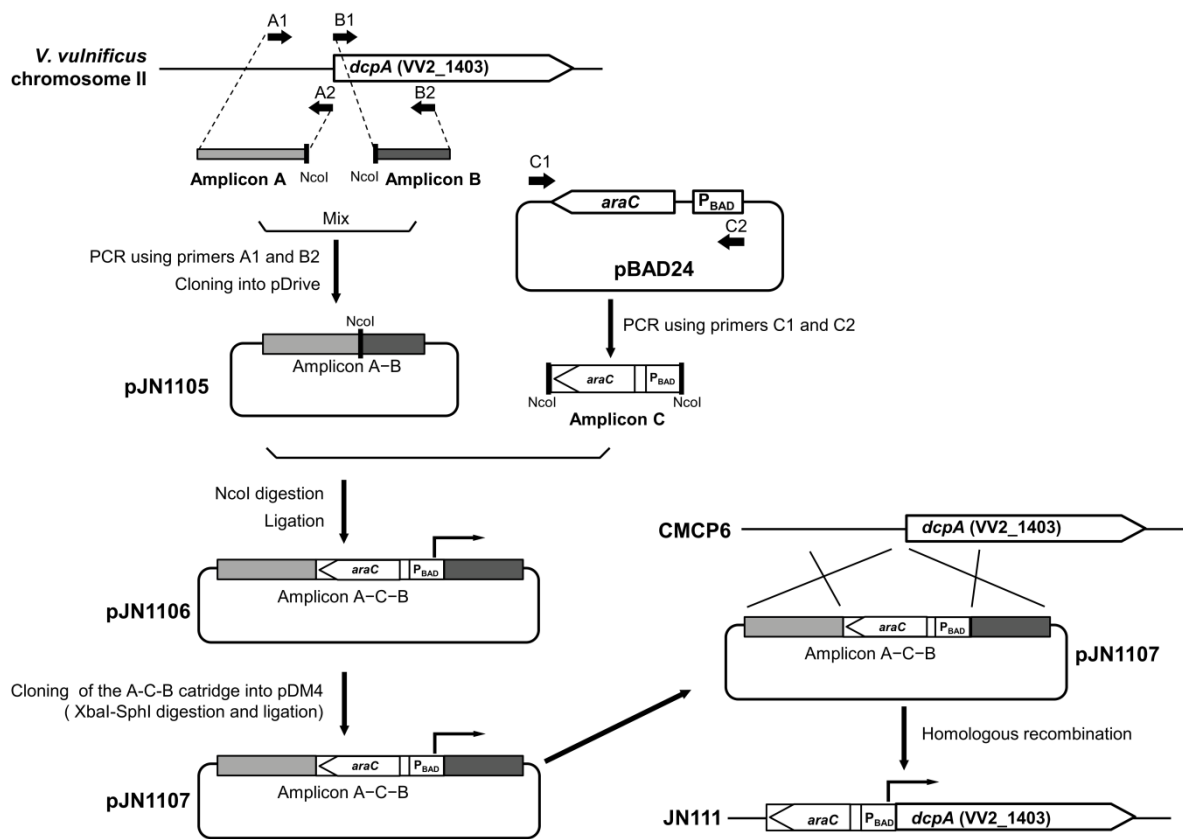

**S1 Fig. Generation of JN111 which expresses *dcpA* under the  $P_{BAD}$  promoter.** A diagram for construction of  $P_{BAD}$ -*dcpA* fusion by insertion of the *araC*- $P_{BAD}$  cassette into the upstream regulatory region of *dcpA* on the *V. vulnificus* CMCP6 chromosome. The promoter region and 5'-distal end of *dcpA* were amplified with pairs of primers A1 and A2 (amplicon A) or B1 and B2 (amplicon B), respectively. An *NcoI* restriction site was added to the 3'-end of the primer A2 and 5'-end of the primer B1, respectively. The 1.9-kb amplicon A-B containing a *NcoI* site was amplified using the mixture of both amplicons as the template and A1 and B2 as primers, and then ligated into pDrive (Qiagen, Valencia, CA), forming pJN1105 (Table 1). The *araC*- $P_{BAD}$  cassette of pBAD24 (Guzman *et al.*, 1995) was amplified by PCR using primers C1 and C2. The PCR product (amplicon C) was ligated with the *NcoI*-digested pJN1105 to form pJN1106 (Table 1). The 3.2-kb *XbaI*-*SphI* digestion product of pJN1106 was isolated and ligated with pDM4 digested with the same enzymes, forming pJN1107. The *E. coli* S17-1 $\lambda$ pir,

*tra* containing pJN1107 was used as conjugal donor to *V. vulnificus* CMCP6. A transconjugant with a genetic background  $P_{BAD}$ -*dcpA* was isolated and named JN111 (Table 1). *Solid lines*, chromosomal and plasmid DNA; *large Xes*, genetic crossing over; *bent arrows*, the transcription orientation of  $P_{BAD}$ ; *closed arrows*, locations of the oligonucleotide primers used for PCR; A1, *dcpA\_F1*; A2, *dcpA\_R1*; B1, *dcpA\_F2*; B2, *dcpA\_R2*; C1, *pBAD24\_F*; C2, *pBAD24\_R* (S3 Table).

## Reference

Guzman L, Dominique B, Michael JC, Beckwith J. Tight regulation, modulation, and high-level expression by vectors containing the arabinose  $P_{BAD}$  promoter. *J Bacteriol.* 1995;177:4121-4130.
