# Supplementary material for: The cabABC Operon Essential for Biofilm and Rugose Colony Development in Vibrio vulnificus
Source: PubMed Central journal article supplement (PMC4584020; doi:10.1371/journal.ppat.1005192), 2015-09-25
Supplement: ppat.1005192.s002.pdf [file ppat.1005192.s002.pdf]

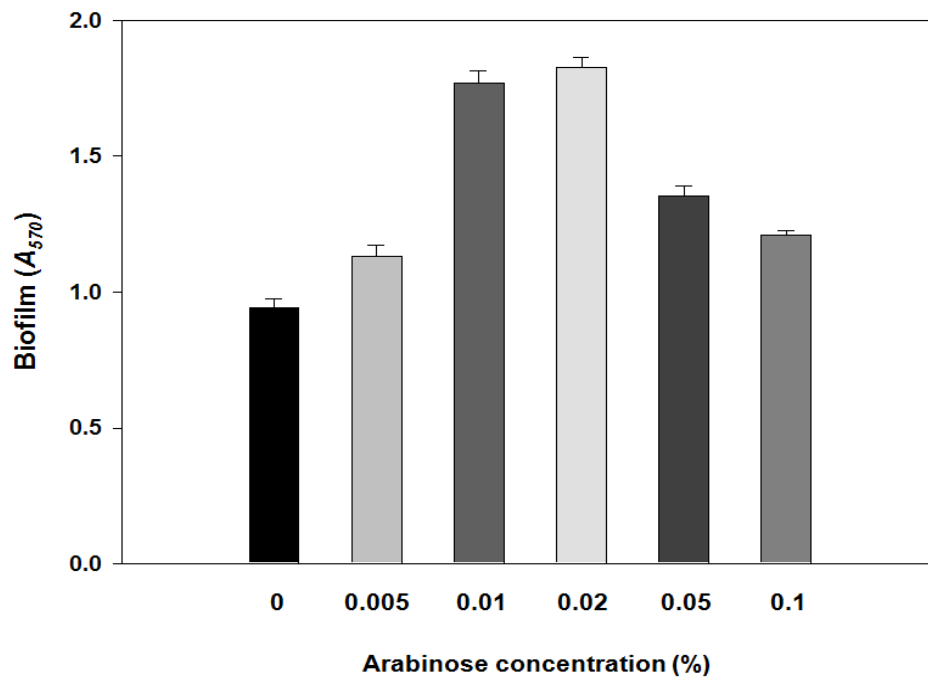

**S2 Fig. Effects of arabinose on biofilm formation.** Each well of 96-well microtiter plates (Nunc, Roskilde, Denmark), containing VFMG-CF supplemented with 10 mM of  $\text{CaCl}_2$  and various levels of arabinose as indicated, was inoculated with 200  $\mu\text{l}$  of the JN111 culture diluted to an  $A_{600}$  0.05. The microtiter plates were incubated for 24 h at 30°C without shaking. Once planktonic cells were removed, the biofilm cells on the wall were washed with PBS, and then stained with 220  $\mu\text{l}$  of 1% crystal violet (CV) solution for 15 min at room temperature. Biofilms were quantified by elution of CV with 220  $\mu\text{l}$  100% ethanol and measurement of absorbance at 570 nm ( $A_{570}$ ). Error bars represent the SD.
