# Supplementary material for: The cabABC Operon Essential for Biofilm and Rugose Colony Development in Vibrio vulnificus
Source: PubMed Central journal article supplement (PMC4584020; doi:10.1371/journal.ppat.1005192), 2015-09-25
Supplement: ppat.1005192.s003.pdf [file ppat.1005192.s003.pdf]

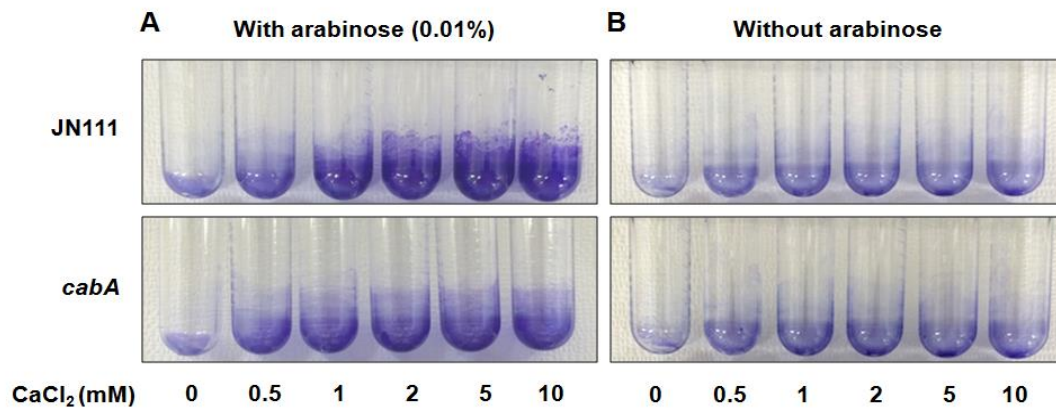

**S3 Fig. Visualization of CV-stained biofilms in test tubes.** Each 14 ml round-bottom test tubes (BD Biosciences, Erembrodegem, Belgium), containing VFMG-CF supplemented with (A) or without (B) 0.01% arabinose and with various levels of  $\text{CaCl}_2$  as indicated, was inoculated with 1 ml of each culture diluted to an  $A_{600}$  0.05. The tubes were incubated for 24 h at 30°C without shaking. Once the planktonic cells were removed, the biofilms on the wall were washed with PBS, and then stained with 1.2 ml of 1% CV solution for 15 min at room temperature. CV-stained biofilms were washed with distilled water and photographed using a digital camera (PowerShot SX220 HS, Canon, Tokyo, Japan). JN111, parent strain; *cabA*, *cabA* mutant.
