# Supplementary material for: The cabABC Operon Essential for Biofilm and Rugose Colony Development in Vibrio vulnificus
Source: PubMed Central journal article supplement (PMC4584020; doi:10.1371/journal.ppat.1005192), 2015-09-25
Supplement: ppat.1005192.s004.pdf [file ppat.1005192.s004.pdf]

**S1 Table. Genes and their products of which expression is differentially regulated in biofilm cells versus planktonic cells<sup>a</sup>**

| <b>UP-REGULATED</b> |                            |                                                                                |
|---------------------|----------------------------|--------------------------------------------------------------------------------|
| <b>Locus tag</b>    | <b>M value<sup>b</sup></b> | <b>Gene product</b>                                                            |
| VV1_0028            | 3.521                      | TRAP-type C4-dicarboxylate transport system, large permease protein            |
| VV1_0029            | 5.399                      | TRAP-type C4-dicarboxylate transport system, small permease protein            |
| VV1_0030            | 6.098                      | TRAP-type C4-dicarboxylate transport system, periplasmic protein               |
| VV1_0336            | 1.938                      | Predicted deacylase                                                            |
| VV1_0403            | 1.490                      | Putative hemolysin                                                             |
| VV1_0404            | 1.565                      | Conserved hypothetical protein                                                 |
| VV1_0405            | 2.012                      | Hypothetical protein                                                           |
| VV1_0406            | 1.419                      | Hypothetical protein                                                           |
| VV1_0407            | 1.381                      | Hypothetical protein                                                           |
| VV1_0408            | 1.381                      | Uncharacterized membrane-associated protein                                    |
| VV1_0411            | 1.490                      | Choline-glycine betaine transporter                                            |
| VV1_0413            | 1.438                      | D-amino acid dehydrogenase, small subunit                                      |
| VV1_0436            | 1.502                      | HesB family protein                                                            |
| VV1_0437            | 2.114                      | NifU homolog involved in Fe-S cluster formation                                |
| VV1_0438            | 2.041                      | Aminotransferase NifS, class V                                                 |
| VV1_0439            | 1.486                      | Predicted transcriptional regulator                                            |
| VV1_0450            | 3.766                      | Malate synthase A                                                              |
| VV1_0463            | 1.322                      | Phosphate ABC transporter, permease protein                                    |
| VV1_0501            | 1.932                      | Carbon starvation protein, putative membrane protein                           |
| VV1_0842            | 2.548                      | Putative outer membrane receptor protein, mostly Fe transport                  |
| VV1_0843            | 1.960                      | Hypothetical protein                                                           |
| VV1_0950            | 2.329                      | Putative integral membrane protein                                             |
| VV1_0981            | 3.293                      | Fatty oxidation complex, alpha subunit                                         |
| VV1_0982            | 2.322                      | Fatty oxidation complex, beta subunit                                          |
| VV1_0985            | 2.139                      | Hypothetical protein                                                           |
| VV1_1229            | 3.047                      | Predicted transcriptional regulator, MerR family                               |
| VV1_1236            | 1.960                      | 3-dehydroquinate dehydratase II                                                |
| VV1_1237            | 5.123                      | Acetyl-coenzyme A synthetase                                                   |
| VV1_1238            | 2.000                      | Putative DNA polymerase III, epsilon subunit                                   |
| VV1_1239            | 2.224                      | Predicted signal-transduction protein containing cAMP-binding and CBS domains  |
| VV1_1242            | 3.083                      | Sensor histidine kinase response regulator containing sodium proline symporter |
| VV1_1243            | 4.198                      | Sodium solute symporter family protein                                         |
| VV1_1244            | 4.741                      | Predicted membrane protein                                                     |
| VV1_1370            | 1.322                      | Acetylornithine deacetylase                                                    |
| VV1_1371            | 2.540                      | N-acetyl-gamma-glutamyl-phosphate reductase                                    |
| VV1_1372            | 2.699                      | Acetylglutamate kinase                                                         |
| VV1_1373            | 2.977                      | Argininosuccinate synthase                                                     |
| VV1_1374            | 2.373                      | Bifunctional protein ArgH                                                      |
| VV1_1466            | 2.108                      | Ornithine carbamoyltransferase                                                 |
| VV1_1588            | 1.381                      | RNA polymerase sigma-38 factor RpoS                                            |
| VV1_1753            | 1.527                      | Hypothetical protein                                                           |

|          |       |                                                                                           |
|----------|-------|-------------------------------------------------------------------------------------------|
| VV1_1800 | 1.608 | Hypothetical protein                                                                      |
| VV1_1835 | 2.178 | Hypothetical protein                                                                      |
| VV1_1836 | 1.801 | Hypothetical protein                                                                      |
| VV1_1837 | 2.816 | Conserved hypothetical protein                                                            |
| VV1_1840 | 1.494 | 50S ribosomal protein L31 type B                                                          |
| VV1_1841 | 1.626 | Putative p-aminobenzoyl-glutamate transporter                                             |
| VV1_1846 | 1.791 | FabH, 3-oxoacyl-                                                                          |
| VV1_1896 | 1.983 | Oxidoreductase, acyl-CoA dehydrogenase family                                             |
| VV1_1975 | 2.191 | Fatty oxidation complex, beta subunit                                                     |
| VV1_2090 | 1.370 | SpoVR-like protein                                                                        |
| VV1_2091 | 1.569 | Conserved hypothetical protein                                                            |
| VV1_2092 | 1.837 | Putative Ser protein kinase                                                               |
| VV1_2224 | 2.388 | Uncharacterized ABC transporter, periplasmic protein                                      |
| VV1_2237 | 4.430 | Extracellular solute-binding protein, family 7                                            |
| VV1_2238 | 2.565 | TRAP-type mannitolchloroaromatic compound transport system, small permease component      |
| VV1_2239 | 1.676 | TRAP-type mannitolchloroaromatic compound transport system, large permease component      |
| VV1_2268 | 3.252 | Putative ATP-binding protein                                                              |
| VV1_2269 | 2.565 | Putative membrane protein                                                                 |
| VV1_2270 | 1.868 | Transcriptional regulator TyrR                                                            |
| VV1_2376 | 2.095 | Conserved hypothetical protein                                                            |
| VV1_2652 | 1.502 | Hypothetical protein                                                                      |
| VV1_2678 | 1.680 | Lactoylglutathione lyase-related enzyme                                                   |
| VV1_2687 | 1.322 | Hypothetical protein                                                                      |
| VV1_2696 | 1.527 | Hypothetical protein                                                                      |
| VV1_2703 | 1.662 | Amino acid ABC transporter, periplasmic amino acid-binding protein                        |
| VV1_2722 | 2.178 | Predicted hydrolase of the HAD superfamily                                                |
| VV1_2723 | 2.152 | Methyl-accepting chemotaxis protein                                                       |
| VV1_2724 | 2.293 | Hypothetical protein                                                                      |
| VV1_2725 | 1.756 | Trypsin-like serine protease                                                              |
| VV1_2728 | 1.761 | PrpE protein                                                                              |
| VV1_2729 | 2.396 | Conserved hypothetical protein                                                            |
| VV1_2730 | 3.095 | Aconitate hydratase 1                                                                     |
| VV1_2731 | 3.926 | Methylcitrate synthase                                                                    |
| VV1_2732 | 4.252 | Carboxyphosphoenolpyruvate phosphonmutase                                                 |
| VV1_2733 | 4.128 | Transcriptional regulator, GntR family                                                    |
| VV1_2734 | 1.900 | Bacterial periplasmic substrate-binding protein                                           |
| VV1_2735 | 1.989 | Conserved hypothetical protein                                                            |
| VV1_2737 | 1.927 | Hypothetical protein                                                                      |
| VV1_2739 | 1.358 | Conserved hypothetical protein                                                            |
| VV1_2766 | 1.535 | 2-keto-4-pentenoate hydratase2-oxohepta-3-ene-1,7-dioic acid hydratase (catechol pathway) |
| VV1_2767 | 2.366 | Homogentisate 1,2-dioxygenase                                                             |
| VV1_2768 | 2.427 | Hemolysin VIIY                                                                            |
| VV1_2772 | 1.565 | Homoserine O-succinyltransferase                                                          |
| VV1_2831 | 2.373 | Oxidoreductase, acyl-CoA dehydrogenase family                                             |
| VV1_2832 | 2.336 | Transcriptional regulator, TetR family                                                    |
| VV1_2846 | 3.444 | Predicted membrane protein                                                                |
| VV1_2847 | 2.059 | DNA-binding response regulator, OmpR family                                               |
| VV1_2848 | 1.816 | Sensor histidine kinase                                                                   |

|          |       |                                                                                               |
|----------|-------|-----------------------------------------------------------------------------------------------|
| VV1_2856 | 2.482 | Hypothetical protein                                                                          |
| VV1_2936 | 1.704 | Putative transcriptional regulator                                                            |
| VV1_2939 | 2.690 | Hypothetical protein                                                                          |
| VV1_2963 | 1.494 | Conserved hypothetical protein                                                                |
| VV1_2968 | 1.515 | Putative iron-regulated protein A                                                             |
| VV1_3065 | 1.431 | Anthranilate synthase component II                                                            |
| VV1_3067 | 1.502 | Indole-3-glycerol phosphate synthase IgpSphosphoribosylanthranilate isomerase TrpF            |
| VV1_3132 | 2.506 | 2,4-dienoyl-CoA reductase                                                                     |
| VV1_3174 | 2.071 | Putative aspartate aminotransferase                                                           |
| VV2_0055 | 1.404 | MoxR-like ATPase                                                                              |
| VV2_0078 | 1.355 | Response regulator containing a CheY-like receiver domain and an HD-GYP domain                |
| VV2_0126 | 2.204 | Hypothetical protein                                                                          |
| VV2_0196 | 1.358 | Opacity protein and related surface antigen                                                   |
| VV2_0205 | 1.523 | EAL domain protein                                                                            |
| VV2_0230 | 1.821 | Cytochrome B561                                                                               |
| VV2_0231 | 1.419 | Conserved hypothetical protein                                                                |
| VV2_0237 | 1.490 | Putative 5'-nucleotidase                                                                      |
| VV2_0248 | 2.662 | Putative CHO cell elongating factor                                                           |
| VV2_0249 | 3.047 | Long-chain fatty acid transport protein                                                       |
| VV2_0264 | 1.671 | Predicted signal transduction protein containing a membrane domain, an EAL and a GGDEF domain |
| VV2_0331 | 2.776 | Conserved hypothetical protein                                                                |
| VV2_0349 | 1.340 | 3-Oxoacyl-(acyl-carrier-protein) synthase III                                                 |
| VV2_0381 | 1.427 | Putative arginase family protein                                                              |
| VV2_0388 | 1.766 | Hypothetical protein                                                                          |
| VV2_0403 | 1.900 | Cytolysin secretion protein VvhB                                                              |
| VV2_0404 | 1.894 | Hemolysincytolysin VvhA                                                                       |
| VV2_0454 | 1.727 | Pterin-4-alpha-carbinolamine dehydratase                                                      |
| VV2_0455 | 2.474 | Phenylalanine-4-hydroxylase                                                                   |
| VV2_0456 | 2.035 | Acetyl-CoA synthase                                                                           |
| VV2_0492 | 1.599 | Acyl-CoA dehydrogenase                                                                        |
| VV2_0493 | 1.569 | NAD-dependent aldehyde dehydrogenase                                                          |
| VV2_0494 | 1.653 | Acetyl-CoA acetyltransferase                                                                  |
| VV2_0495 | 1.776 | Predicted transcriptional regulator, MerR family                                              |
| VV2_0496 | 1.653 | Acyl-CoA dehydrogenase                                                                        |
| VV2_0497 | 1.407 | Acetyl-CoA carboxylase, carboxyltransferase component                                         |
| VV2_0550 | 1.613 | Transcriptional regulator, SorC family                                                        |
| VV2_0552 | 1.894 | Transaldolase B                                                                               |
| VV2_0558 | 2.071 | 3-deoxy-D-arabino-heptulosonate 7-phosphate (DAHP) synthase                                   |
| VV2_0559 | 2.396 | Outer membrane protein, OmpA family                                                           |
| VV2_0560 | 1.884 | Polyprenyltransferase (cytochrome oxidase assembly factor)                                    |
| VV2_0579 | 1.404 | Putative thioredoxin                                                                          |
| VV2_0654 | 1.336 | Transposase and inactivated derivative                                                        |
| VV2_0680 | 1.955 | Putative permease                                                                             |
| VV2_0681 | 2.245 | Hypothetical protein                                                                          |
| VV2_0717 | 2.041 | Hypothetical protein                                                                          |
| VV2_0766 | 2.279 | Hypothetical protein                                                                          |
| VV2_0814 | 1.466 | Putative lipoprotein                                                                          |
| VV2_0816 | 3.059 | Arginine ABC transporter, periplasmic arginine-binding protein                                |

|          |       |                                                                                       |
|----------|-------|---------------------------------------------------------------------------------------|
| VV2_0817 | 2.671 | Arginine ABC transporter, permease protein                                            |
| VV2_0818 | 2.653 | Arginine ABC transporter, permease protein                                            |
| VV2_0819 | 1.604 | Pyridoxamine 5'-phosphate oxidase                                                     |
| VV2_0839 | 1.771 | Chorismate mutase                                                                     |
| VV2_0870 | 1.704 | Sigma 54-dependent transcriptional regulator                                          |
| VV2_0891 | 1.427 | Conserved hypothetical protein                                                        |
| VV2_0919 | 1.617 | Conserved hypothetical protein                                                        |
| VV2_0947 | 2.816 | Hypothetical protein                                                                  |
| VV2_0989 | 1.527 | Alkyl sulfatase and related hydrolase                                                 |
| VV2_1011 | 2.000 | Hydroxamate-dependent iron ABC transporter, ATP-binding protein                       |
| VV2_1012 | 1.569 | Hydroxamate-dependent iron ABC transporter, periplasmic protein                       |
| VV2_1037 | 1.544 | PilB-related protein                                                                  |
| VV2_1137 | 2.245 | Conserved hypothetical protein                                                        |
| VV2_1166 | 1.523 | Chemotaxis signal transduction protein CheW                                           |
| VV2_1168 | 1.355 | Chemotaxis protein histidine kinase CheA                                              |
| VV2_1169 | 1.667 | Chemotaxis protein CheY                                                               |
| VV2_1170 | 1.582 | Putative anti-anti-sigma regulatory factor                                            |
| VV2_1203 | 1.868 | Conserved hypothetical protein                                                        |
| VV2_1204 | 1.411 | Glutathione synthase                                                                  |
| VV2_1210 | 1.523 | Hypothetical protien                                                                  |
| VV2_1215 | 1.771 | Putative transcriptional regulator, TetR family                                       |
| VV2_1216 | 1.595 | Putative hydrolase                                                                    |
| VV2_1279 | 1.362 | GGDEF family protein                                                                  |
| VV2_1458 | 1.878 | Spermidineputrescine ABC transporter, permidineputrescine-binding periplasmic protein |
| VV2_1468 | 1.949 | Conserved hypothetical protein                                                        |
| VV2_1471 | 1.680 | CuZn superoxide dismutase                                                             |
| VV2_1472 | 1.868 | AnkB protein                                                                          |
| VV2_1479 | 1.454 | Putative permease                                                                     |
| VV2_1570 | 3.108 | Transcriptional regulator, BrpT                                                       |
| VV2_1571 | 2.766 | A protein with putative calcium-binding motifs                                        |
| VV2_1572 | 1.544 | ABC-type transporter                                                                  |
| VV2_1573 | 1.411 | Membrane fusion protein (MFP)                                                         |
| VV2_1576 | 1.842 | Glycosyltransferase, BrpI                                                             |
| VV2_1577 | 1.599 | Hypothetical protein, BrpH                                                            |
| VV2_1579 | 1.586 | Putative exopolysaccharide biosynthesis protein, BrpD                                 |
| VV2_1580 | 1.971 | Putative polysaccharide export-related protein, BrpC                                  |
| VV2_1582 | 1.470 | Undecaprenyl-phosphate glucose phosphotransferase, BrpA                               |
| VV2_1619 | 1.478 | Putative chemotaxis protein CheV                                                      |
| VV2_1626 | 2.120 | Predicted membrane protein                                                            |
| VV2_1657 | 1.556 | Hypothetical protein                                                                  |

---

### DOWN-REGULATED

---

| Locus tag | M value <sup>b</sup> | Gene product                                                                             |
|-----------|----------------------|------------------------------------------------------------------------------------------|
| VV1_0053  | -1.508               | Histidine ammonia-lyase                                                                  |
| VV1_0154  | -1.635               | Succinyl-CoA synthetase, alpha subunit                                                   |
| VV1_0155  | -1.439               | Succinyl-CoA synthetase, beta subunit                                                    |
| VV1_0156  | -1.643               | 2-oxoglutarate dehydrogenase complex, E2 component, dihydrolipoamide succinyltransferase |
| VV1_0213  | -1.618               | Polar flagellin FlaE                                                                     |

|          |        |                                                                                                                    |
|----------|--------|--------------------------------------------------------------------------------------------------------------------|
| VV1_0214 | -1.934 | Polar flagellin FlaD                                                                                               |
| VV1_0288 | -1.525 | Trehalose-6-phosphate hydrolase                                                                                    |
| VV1_0289 | -1.676 | PTS system, trehalose-specific IIBC component                                                                      |
| VV1_0346 | -1.338 | Putative p-aminobenzoyl-glutamate transporter                                                                      |
| VV1_0362 | -1.515 | Hypothetical protein                                                                                               |
| VV1_0363 | -3.598 | Sodiumglutamate symporter GltP                                                                                     |
| VV1_0423 | -1.398 | GTP binding protein EngA                                                                                           |
| VV1_0486 | -1.423 | Ribosome-associated inhibitor A                                                                                    |
| VV1_0542 | -2.347 | Acid-induced glycyl radical enzyme                                                                                 |
| VV1_0578 | -1.613 | UDP-N-acetylglucosamine-N-acetylmuramyl-(pentapeptide) pyrophosphoryl-undecaprenol N-acetylglucosamine transferase |
| VV1_0580 | -3.578 | UDP-N-acetylmuramoylalanine-D-glutamate ligase                                                                     |
| VV1_0630 | -1.325 | Conserved hypothetical protein                                                                                     |
| VV1_0632 | -1.494 | RNA polymerase sigma-70 factor RpoD                                                                                |
| VV1_0679 | -1.450 | UDP-N-acetylglucosamine enolpyruvyl transferase                                                                    |
| VV1_0707 | -1.362 | Fructose-1,6-bisphosphatase                                                                                        |
| VV1_0743 | -1.547 | Ribosomal protein S5                                                                                               |
| VV1_0744 | -1.633 | Ribosomal protein L18                                                                                              |
| VV1_0745 | -1.669 | Ribosomal protein L6                                                                                               |
| VV1_0746 | -1.952 | Ribosomal protein S8                                                                                               |
| VV1_0747 | -1.523 | Ribosomal protein S14                                                                                              |
| VV1_0749 | -1.787 | Ribosomal protein L5                                                                                               |
| VV1_0750 | -1.746 | Ribosomal protein L24                                                                                              |
| VV1_0751 | -1.983 | Ribosomal protein L14                                                                                              |
| VV1_0753 | -1.774 | Ribosomal protein S17                                                                                              |
| VV1_0761 | -1.665 | 50S ribosomal protein L4                                                                                           |
| VV1_0762 | -1.786 | 50S ribosomal protein L3                                                                                           |
| VV1_0763 | -2.151 | 30S ribosomal protein S10                                                                                          |
| VV1_0774 | -1.383 | Nucleotide sugar dehydrogenase                                                                                     |
| VV1_0776 | -1.630 | Putative galactosyl-transferase                                                                                    |
| VV1_0777 | -1.805 | Nucleoside-diphosphate-sugar epimerase                                                                             |
| VV1_0778 | -1.380 | Glycosyl transferases group1 family protein                                                                        |
| VV1_0779 | -2.035 | UDP-N-acetyl-D-mannosaminuronate dehydrogenase                                                                     |
| VV1_0780 | -2.009 | UDP-N-acetylglucosamine 2-epimerase                                                                                |
| VV1_0781 | -1.745 | Putative tyrosine-protein kinase Wzc                                                                               |
| VV1_0782 | -1.734 | Hypothetical protein                                                                                               |
| VV1_0784 | -1.543 | Hypothetical protein                                                                                               |
| VV1_0785 | -1.387 | Hypothetical protein                                                                                               |
| VV1_0875 | -1.344 | Type II secretory pathway, component EpsF                                                                          |
| VV1_0997 | -1.427 | DNA replication and repair protein RecF                                                                            |
| VV1_1005 | -1.575 | Ribonuclease P protein component (RNaseP protein)                                                                  |
| VV1_1014 | -1.774 | ATP synthase protein I                                                                                             |
| VV1_1019 | -1.437 | ATP synthase F1, alpha subunit                                                                                     |
| VV1_1196 | -1.437 | Putative acetyltransferase                                                                                         |
| VV1_1197 | -1.532 | UDP-N-acetylenolpyruvoylglucosamine reductase                                                                      |
| VV1_1200 | -1.373 | Pantothenate kinase                                                                                                |
| VV1_1205 | -1.669 | Preprotein translocase subunit SecE                                                                                |
| VV1_1206 | -1.844 | Transcription antitermination protein NusG                                                                         |
| VV1_1207 | -2.077 | 50S ribosomal protein L11                                                                                          |
| VV1_1208 | -2.010 | 50S ribosomal protein L1                                                                                           |
| VV1_1209 | -1.502 | 50S ribosomal protein L10                                                                                          |

|          |        |                                                                               |
|----------|--------|-------------------------------------------------------------------------------|
| VV1_1338 | -1.623 | Translation elongation factor G (EF-G)                                        |
| VV1_1360 | -1.334 | 50S ribosomal protein L31                                                     |
| VV1_1387 | -1.539 | 30S ribosomal protein S6                                                      |
| VV1_1442 | -1.377 | MSHA pilin protein MshB                                                       |
| VV1_1444 | -1.323 | Putative MSHA pilin protein MshC                                              |
| VV1_1445 | -1.490 | Putative MSHA pilin protein MshD                                              |
| VV1_1454 | -1.543 | Predicted membrane protein                                                    |
| VV1_1615 | -1.440 | 30S ribosomal protein S16                                                     |
| VV1_1616 | -1.375 | 16S rRNA processing protein RimM                                              |
| VV1_1617 | -1.504 | tRNA-(guanine-N1)-methyltransferase                                           |
| VV1_1618 | -1.375 | 50S ribosomal protein L19                                                     |
| VV1_1629 | -1.891 | Pyruvate dehydrogenase complex repressor                                      |
| VV1_1631 | -1.768 | Pyruvate dehydrogenase complex E2 component, dihydrolipoamide acyltransferase |
| VV1_1691 | -1.569 | Dihydropteroate synthase                                                      |
| VV1_1694 | -1.886 | Conserved hypothetical protein                                                |
| VV1_1695 | -1.804 | N utilization substance protein A                                             |
| VV1_1696 | -1.560 | Translation initiation factor IF-2                                            |
| VV1_1697 | -1.661 | Ribosome-binding factor A                                                     |
| VV1_1727 | -1.593 | Phosphopentomutase                                                            |
| VV1_1785 | -1.660 | Aerobic glycerol-3-phosphate dehydrogenase                                    |
| VV1_1866 | -1.351 | 1-deoxy-D-xylulose 5-phosphate reductoisomerase                               |
| VV1_1923 | -1.347 | Polar flagellin FlaF                                                          |
| VV1_1926 | -2.013 | Polar flagellin FlaA                                                          |
| VV1_1956 | -1.563 | Chemotaxis responser regulator CheB                                           |
| VV1_1957 | -1.594 | SOJ-like and chromosome partitioning protein                                  |
| VV1_1958 | -2.049 | Chemotaxis signal transduction protein CheW                                   |
| VV1_1959 | -1.473 | Chemotaxis signal transduction protein CheW                                   |
| VV1_1960 | -1.944 | Hypothetical protein                                                          |
| VV1_1966 | -1.506 | Cytochrome c-type biogenesis protein CcmF                                     |
| VV1_1967 | -1.409 | Thiol:disulfide interchange protein DsbE                                      |
| VV1_1968 | -1.557 | Cytochrome c-type biogenesis protein CcmH                                     |
| VV1_1969 | -1.426 | Cytochrome c-type biogenesis factor                                           |
| VV1_2015 | -2.909 | Conserved hypothetical protein                                                |
| VV1_2016 | -2.662 | Putative lactoylglutathione lyase                                             |
| VV1_2220 | -1.743 | Phosphate acetyltransferase                                                   |
| VV1_2257 | -1.344 | 6-pyruvoyl tetrahydrobiopterin synthase                                       |
| VV1_2258 | -1.581 | Putative acetyltransferase                                                    |
| VV1_2259 | -2.878 | Hypothetical protein                                                          |
| VV1_2306 | -1.328 | Hypothetical protein                                                          |
| VV1_2308 | -1.976 | Putative glycosyltransferase protein                                          |
| VV1_2309 | -1.405 | Putative glycosyltransferase protein                                          |
| VV1_2311 | -1.498 | Hypothetical protein                                                          |
| VV1_2312 | -1.351 | Hypothetical protein                                                          |
| VV1_2388 | -1.875 | Hypothetical protein                                                          |
| VV1_2587 | -1.622 | Ferredoxin                                                                    |
| VV1_2588 | -1.748 | Putative formate dehydrogenase-specific chaperone                             |
| VV1_2589 | -1.955 | Hypothetical protein                                                          |
| VV1_2591 | -1.379 | Formate dehydrogenase, iron-sulfur subunit                                    |
| VV1_2891 | -1.472 | Hypothetical protien                                                          |
| VV1_2892 | -2.391 | Outer membrane protein                                                        |

|          |        |                                                         |
|----------|--------|---------------------------------------------------------|
| VV1_3006 | -1.423 | 3-oxoacyl-(acyl-carrier-protein) synthase II            |
| VV1_3007 | -1.705 | Hypothetical protein                                    |
| VV1_3009 | -1.577 | 3-oxoacyl-(acyl-carrier-protein) reductase              |
| VV1_3010 | -2.234 | Malonyl CoA-acyl carrier protein transacylase           |
| VV1_3011 | -1.700 | 3-oxoacyl-(acyl-carrier-protein) synthase III           |
| VV1_3108 | -1.618 | Hypothetical protein                                    |
| VV1_3213 | -2.033 | Hypothetical protein                                    |
| VV1_3214 | -1.527 | Hypothetical protein                                    |
| VV1_3215 | -1.795 | Hypothetical protein                                    |
| VV1_3217 | -1.846 | Hypothetical protein                                    |
| VV1_3231 | -1.380 | Hypothetical protein                                    |
| VV1_3234 | -2.301 | Hypothetical protein                                    |
| VV2_0005 | -2.076 | Phosphoenolpyruvate synthase                            |
| VV2_0006 | -1.575 | Conserved hypothetical protein                          |
| VV2_0009 | -1.865 | Hypothetical protein                                    |
| VV2_0010 | -1.719 | Anaerobic glycerol-3-phosphate dehydrogenase, subunit A |
| VV2_0011 | -1.681 | Anaerobic glycerol-3-phosphate dehydrogenase, subunit B |
| VV2_0019 | -2.548 | Alcohol dehydrogenase, class IV                         |
| VV2_0084 | -1.978 | FlpFap pilin component containing protein               |
| VV2_0148 | -1.620 | Acetate kinase 2                                        |
| VV2_0186 | -1.608 | Glycine cleavage system P protein (pyridoxal-binding)   |
| VV2_0187 | -2.155 | Glycine cleavage system H protein (lipoate-binding)     |
| VV2_0188 | -2.932 | Serine hydroxymethyltransferase                         |
| VV2_0376 | -1.666 | Putative sensor histidine kinase response regulator     |
| VV2_0477 | -1.559 | Methyl-accepting chemotaxis protein                     |
| VV2_0478 | -2.491 | Alanine racemase 2                                      |
| VV2_0503 | -3.842 | Cold shock protein CspA                                 |
| VV2_0519 | -2.469 | Cold shock protein CSD                                  |
| VV2_0854 | -2.417 | Tryptophanase                                           |
| VV2_0855 | -1.495 | Tryptophan-specific transport permease protein          |
| VV2_1252 | -1.532 | 1,4-alpha-glucan branching enzyme                       |
| VV2_1315 | -1.323 | Hypothetical protein                                    |
| VV2_1318 | -1.534 | Pseudouridylate synthase, 23S RNA-specific              |
| VV2_1355 | -2.134 | Putative integral membrane protein                      |
| VV2_1373 | -1.704 | Uridine phosphorylase                                   |
| VV2_1484 | -2.221 | 2-amino-3-ketobutyrate coenzyme A ligase                |
| VV2_1485 | -1.928 | L-threonine 3-dehydrogenase                             |
| VV2_1543 | -1.364 | Deoxyribodipyrimidine photolyase                        |
| VV2_1690 | -1.601 | Hypothetical protein                                    |

<sup>a</sup> Locus tag numbers and annotation of gene products are based on the database of the *V. vulnificus* CMCP6 genome, which was retrieved from GenBank.

<sup>b</sup> The M value represents the log<sub>2</sub> ratio of DNA hybridization intensity of each gene in the biofilms versus planktonic cells. The values shown are the mean from three independent experiments. The locus tags and genes with  $M \geq 1.322$  or  $M \leq -1.322$  (expression ratios of  $\geq 2.5$ ,  $P < 0.05$ ) were considered as the genes differentially regulated in biofilms.
