# Supplementary material for: The cabABC Operon Essential for Biofilm and Rugose Colony Development in Vibrio vulnificus
Source: PubMed Central journal article supplement (PMC4584020; doi:10.1371/journal.ppat.1005192), 2015-09-25
Supplement: ppat.1005192.s005.pdf [file ppat.1005192.s005.pdf]

**S2 Table. Preferential expression of *cabABC* in biofilms<sup>a</sup>**

| Locus tag | Gene        | Product                                        | Microarray                               |                 | qRT-PCR                                  |                 |
|-----------|-------------|------------------------------------------------|------------------------------------------|-----------------|------------------------------------------|-----------------|
|           |             |                                                | Mean Log <sub>2</sub> ratio <sup>b</sup> | <i>P</i> -value | Mean Log <sub>2</sub> ratio <sup>b</sup> | <i>P</i> -value |
| VV2_1571  | <i>cabA</i> | A protein with putative calcium-binding motifs | 2.766                                    | 6.67E-03        | 2.967                                    | 3.76E-04        |
| VV2_1572  | <i>cabB</i> | ABC-type transporter                           | 1.544                                    | 2.50E-02        | 1.975                                    | 7.75E-07        |
| VV2_1573  | <i>cabC</i> | Membrane fusion protein (MFP)                  | 1.411                                    | 2.92E-03        | 1.592                                    | 5.40E-04        |

<sup>a</sup> The consecutive *cabABC* genes were selected from the pool of genes that are up-regulated in biofilms (S1 Table). Their preferential expression in the biofilms was confirmed by qRT-PCR using the primer sets listed in S3 Table. Locus tag numbers and annotation of gene products are based on the database of the *V. vulnificus* CMCP6 genome, which was retrieved from GenBank. ABC-type transporter, ATP-binding cassette type transporter.

<sup>b</sup> The values represent the log<sub>2</sub> ratio of mRNA expression of each gene in the biofilms versus planktonic cells. The values shown are the mean from three independent experiments.
