# Supplementary material for: The cabABC Operon Essential for Biofilm and Rugose Colony Development in Vibrio vulnificus
Source: PubMed Central journal article supplement (PMC4584020; doi:10.1371/journal.ppat.1005192), 2015-09-25
Supplement: ppat.1005192.s006.pdf [file ppat.1005192.s006.pdf]

**S3 Table. Oligonucleotides used in this study**

| Oligonucleotide <sup>a</sup> | Sequence (5' → 3') <sup>b</sup>          | Use                                                    |
|------------------------------|------------------------------------------|--------------------------------------------------------|
| RTcabA                       | CAGATTTTGTGCTCATGCGG                     | RT-PCR of <i>cabABC</i>                                |
| RTcabC2                      | AGATAGCTGATTGGCGTCCGTG                   |                                                        |
| cabAexp_F                    | <u>CCATGGCTGTTTATTCTGGA</u> ACTG         | Amplification of the <i>cabA</i> coding region         |
| cabAexp_R                    | <u>CTCGAGGAATTGGAACATGTCATC</u>          |                                                        |
| dcpA_F1                      | ACCCCGCTTGTGAGGTGAAC                     | Integration of <i>P<sub>BAD</sub></i> with <i>dcpA</i> |
| dcpA_R1                      | <u>GATTCCATGGCGTTAGCCA</u> ACTGTAAT      |                                                        |
| dcpA_F2                      | <u>AACGCCATGGAATCATATTTAGGTA</u> AAGGAAG |                                                        |
| dcpA_R2                      | GAGCCCGTTAGATCAGAGACATGTCAG              |                                                        |
| pBAD24_F                     | <u>CCATGGTGCATAATGTGCCTGTC</u>           |                                                        |
| pBAD24_R                     | CCGGGTACCATGGTGAATTCCT                   |                                                        |
| cabA_F1                      | <u>ACTAGTGGTGGAGCGAAGA</u> AGGAA         | Construction of the <i>cabA</i> mutant                 |
| cabA_R1                      | <u>CGGGATCCGTTCCAGAATA</u> AAACA         |                                                        |
| cabA_F2                      | <u>ACGGATCCC</u> GGATGACATGTT            |                                                        |
| cabA_R2                      | <u>GCATGCGATAAAGAGAGGA</u> ACCAC         |                                                        |
| cabB_F1                      | GAAGTTGATTGGTGTGACAGAAGCAG               | Construction of the <i>cabB</i> mutant                 |
| cabB_R1                      | <u>AAGGATCCAAGCGTCTGTAAATCTCTC</u>       |                                                        |
| cabB_F2                      | <u>TTGGATCCTTGCTCATA</u> ATCCGAG         |                                                        |
| cabB_R2                      | GACGGCATGGACAAACCGTC                     |                                                        |
| cabC_F1                      | AATAACGGAGAGAAATGGTGAGACGTTAG            | Construction of the <i>cabC</i> mutant                 |
| cabC_R1                      | <u>ATGGATCCTTCCCAGACAATCTCACT</u>        |                                                        |
| cabC_F2                      | <u>AAGGATCCATGACCAAGATGCTCAG</u>         |                                                        |
| cabC_R2                      | GTACGTTTTTCGACATCCGATATGATGAC            |                                                        |
| brpA_F1                      | GCGGGTTTTAC GCCTATCGTGG                  | Construction of the <i>brpA</i> mutant                 |
| brpA_R1                      | <u>CATCGGATCCATGTGCACATCTCGT</u>         |                                                        |
| brpA_F2                      | <u>ACATGGATCCGATGCAGCTCATTG</u>          |                                                        |
| brpA_R2                      | GCAACTGTTGTTGATATTTTCGCGAGGC             |                                                        |
| cabAcom_F                    | <u>AGTCCATGGTCCAATAATGGAATCAA</u> AAGAGG | Complementation of the <i>cabA</i> mutant              |
| cabAcom_R                    | <u>CTGCATGCCACCTAGAAGTAGTG</u>           |                                                        |
| cabBcom_F                    | <u>AGCCATGGGTAGTAATT</u> TGCAAATTC       | Complementation of the <i>cabB</i> mutant              |
| cabBcom_R                    | <u>AAGCATGCAACGTCTCACCATTTC</u>          |                                                        |
| cabCcom_F                    | <u>AGCCATGGCTAATCAAATAACGGAG</u>         | Complementation of the <i>cabC</i> mutant              |
| cabCcom_R                    | <u>GAGCATGCATACATCAGTAATCATTTCG</u>      |                                                        |
| qRTcabA_F                    | TTGGTTGCTGGCTCTGGTGAC                    | qRT-PCR                                                |
| qRTcabA_R                    | ACTGTCTATACGCACTGTGTCCTC                 |                                                        |
| qRTcabB_F                    | GCCATTGCCAGACCCAGAG                      |                                                        |

|           |                         |
|-----------|-------------------------|
| qRTcabB_R | CCGATAATACCAACCGCACAACC |
| qRTcabC_F | TTGGCGGTGGTATTGGCTACTG  |
| qRTcabC_R | TGTTGAATTGCCTGGCGTTGAC  |

---

<sup>a</sup> The oligonucleotides were designed using the *V. vulnificus* CMCP6 genome sequence.

<sup>b</sup> Regions of oligonucleotides not complementary to corresponding genes are underlined.
